# Supplementary material for: Eggshell incorporated agro-waste adsorbent pellets for sustainable orthophosphate capture from aqueous media
Source: Royal Society of Chemistry journal article supplement (doi:10.1039/d3su00415e), 2024-01-01
Supplement: d3su00415e1.pdf [file d3su00415e1.pdf]

## Electronic Supplementary Information (ESI)

# Eggshell incorporated agro-waste adsorbent pellets for sustainable orthophosphate capture from aqueous media

Bernd G.K. Steiger<sup>1</sup>, Nam Bui<sup>1</sup>, Bolanle Babalola<sup>1</sup> and Lee D. Wilson<sup>1\*</sup>

<sup>1</sup>Department of Chemistry, University of Saskatchewan, 110 Science Place - Room 156 Thorvaldson Building, Saskatoon, SK S7N 5C9, Canada

\*Corresponding author: L. D. Wilson (Tel. +1-306-966-2961; [lee.wilson@usask.ca](mailto:lee.wilson@usask.ca))

This ESI material includes the following content:

### Methods

TGA, XRD, FT-IR Spectroscopy, NMR Spectroscopy, and Surface Area via PNP Dye Adsorption

### Tables

**Table S1:** Isotherm parameter for orthophosphate adsorption at pH 4.5 onto C22.

**Table S1:** Isotherm parameters for orthophosphate adsorption at pH 8.5 onto the agro-waste composites.

**Table S2:** Equations and parameters of both Freundlich and Langmuir adsorption isotherm models.

### Figures

**Fig. S1** – Digital image of the mold/tray used to prepare the samples with scale.

**Fig. S1:** DTG profiles (A) of pristine calcium carbonate as comparison to eggshells (washed) and their respective weight loss profiles (B).

**Fig. S2:** DTG profiles (A) of torrefied wheat straw (TWS) and chitosan and their TG profiles (B) respectively.

**Fig. S3:** FT-IR spectra of the raw materials used to prepare the pelletized adsorbents.

**Fig. S4:** Orthophosphate adsorption isotherm study of C72 at pH 4.5.

**Fig. S5:** Orthophosphate adsorption isotherm study of C20 at pH 4.5.

**Fig. S6:** Orthophosphate adsorption isotherm study of C21 at pH 4.5.

**Fig. S7:** Orthophosphate isotherms (Sips Isotherm Model) at pH 8.5 on C72 (A), C20 (B), C21 (C) and C22 (D).

## S1. Methods

### *TGA*

The ground samples were subjected to a heating rate of 10°C/min after equilibration of 1 min at 30 °C in an open aluminium pan in a N<sub>2</sub> atmosphere. Only the obtained TG curves were normalized via “divide by max”.

### *XRD*

A CuK $\alpha$  radiation (40 kV and 30 mA) with  $\lambda = 1970.1541$  nm was used over a  $2\theta$  angle range from 5° to 80° to obtain the powder XRD (PXRD) profiles.

### *FT-IR Spectroscopy*

Samples were ground with KBr (FT-IR grade) and a sample powder in a 10:1 ratio (KBr to sample) with a mortar and pestle. The spectra were recorded at 295 K over a spectral range of 400-4000 cm<sup>-1</sup> with a 4 cm<sup>-1</sup> resolution, including normalization, according to a [0,1] scale. A minimum of 64 scans were recorded and the spectral background was corrected against pure KBr.

### *NMR Spectroscopy*

The CP-TOSS method (cross-polarization with total suppression of spinning sidebands) was used to collect the <sup>13</sup>C NMR spectra. The sample spinning speed was 7.5 kHz, and a <sup>1</sup>H 90° pulse on the <sup>1</sup>H channel. Spectral acquisition employed up to 20k scans with a cycle delay of 1 s with 50 kHz SPINAL-64 decoupling sequence. The <sup>13</sup>C shifts were referenced to adamantane (38.48 ppm low field signal). The spectra were normalized according to a [0,1] scale.

### *Surface Area via PNP Dye Adsorption*

A fixed amount (20 mg) of the TWCs were added to 10 mL of PNP solution (0.5-20 mM, buffered with 30 mM acetic acid or carbonate at pH 4.5 or 8.5). The solutions were equilibrated overnight on an orbital shaker at ca. 22 °C and measured in duplicate.

**Table S1:** Isotherm parameter for orthophosphate adsorption at pH 4.5 onto C22.

| Sips Parameter       | Q (mg/g)    | K <sub>a</sub>   | n         | R <sup>2</sup> |
|----------------------|-------------|------------------|-----------|----------------|
| C72                  | 22.9 ± 7.7  | 0.0018 ± 0.001   | 2.1 ± 1.3 | 0.967          |
| C20                  | 28.1 ± 6.1  | 0.0014 ± 0.0004  | 2.3 ± 0.7 | 0.989          |
| C21                  | 30.1 ± 12   | 0.0015 ± 0.001   | 1.7 ± 0.9 | 0.971          |
| C22                  | 22.2 ± 2.1  | 0.0095 ± 0.0009  | 1.3 ± 0.3 | 0.969          |
| Langmuir Parameter   | Q           | K                |           | R <sup>2</sup> |
| C72                  | 62.0 ± 38.6 | 0.0005 ± 0.0004  |           | 0.949          |
| C20                  | 65.4 ± 64.0 | 0.0005 ± 0.0007  |           | 0.778          |
| C21                  | 73.5 ± 47.5 | 0.0003 ± 0.0003  |           | 0.966          |
| C22                  | 31.5 ± 3.7  | 0.0021 ± 0.00048 |           | 0.954          |
| Freundlich Parameter |             | K                | n         | R <sup>2</sup> |
| C72                  |             | 0.077 ± 0.10     | 1.3 ± 0.3 | 0.936          |
| C20                  |             | 0.013 ± 0.02     | 1.0 ± 0.2 | 0.973          |
| C21                  |             | 0.050 ± 0.05     | 1.2 ± 0.2 | 0.960          |
| C22                  |             | 0.68 ± 0.48      | 2.0 ± 0.4 | 0.880          |

**Table S2:** Isotherm parameters for orthophosphate adsorption at pH 8.5 onto the agro-waste composites.

| Sips Parameter       | Q (mg/g)    | K <sub>a</sub>  | n              | R <sup>2</sup> |
|----------------------|-------------|-----------------|----------------|----------------|
| C72                  | 12.1 ± 0.7  | 0.005 ± 0.001   | 2.02 ± 0.26    | 0.98132        |
| C20                  | 11.6 ± 1.2  | 0.005 ± 0.001   | 2.31 ± 0.21    | 0.93548        |
| C21                  | 8.90 ± 1.4  | 0.007 ± 0.002   | 1.28 ± 0.36    | 0.92976        |
| C22                  | 10.3 ± 1.1  | 0.009 ± 0.001   | 3.11 ± 0.46    | 0.98837        |
| Langmuir Parameter   | Q           | K               | R <sup>2</sup> |                |
| C72                  | 29.5 ± 7.0  | 0.0008 ± 0.0003 | 0.94827        |                |
| C20                  | 25.3 ± 6.3  | 0.0009 ± 0.0004 | 0.92938        |                |
| C21                  | 16.4 ± 2.6  | 0.0018 ± 0.0006 | 0.91077        |                |
| C22                  | 10.8 ± 1.3  | 0.0080 ± 0.0026 | 0.83442        |                |
| Freundlich Parameter | K           |                 | n              | R <sup>2</sup> |
| C72                  | 0.05 ± 0.01 |                 | 1.2 ± 0.1      | 0.98009        |
| C20                  | 0.07 ± 0.04 |                 | 1.3 ± 0.2      | 0.91198        |
| C21                  | 0.16 ± 0.07 |                 | 1.6 ± 0.2      | 0.91329        |
| C22                  | 0.49 ± 0.28 |                 | 2.1 ± 0.4      | 0.75437        |

**Table S3:** Equations and parameters of both Freundlich and Langmuir adsorption isotherm models.

---

|                     |                                         |                                                                                                                                                                                      |
|---------------------|-----------------------------------------|--------------------------------------------------------------------------------------------------------------------------------------------------------------------------------------|
| Freundlich Isotherm | $q_e = K_f C_e^{\frac{1}{n}}$           | $q_e$ = monolayer adsorption capacity at equilibrium<br>$C_e$ = equilibrium adsorbate concentration<br>$K_f$ = Freundlich constant<br>$n$ = Freundlich exponent                      |
| Langmuir Isotherm   | $q_e = \frac{q_m K_L C_e}{1 + K_L C_e}$ | $q_m$ = equilibrium monolayer adsorption capacity<br>$K_L$ = Langmuir adsorption constant<br>$C_e$ = adsorbate concentration at equilibrium<br>$q_e$ = bound adsorbate concentration |

---

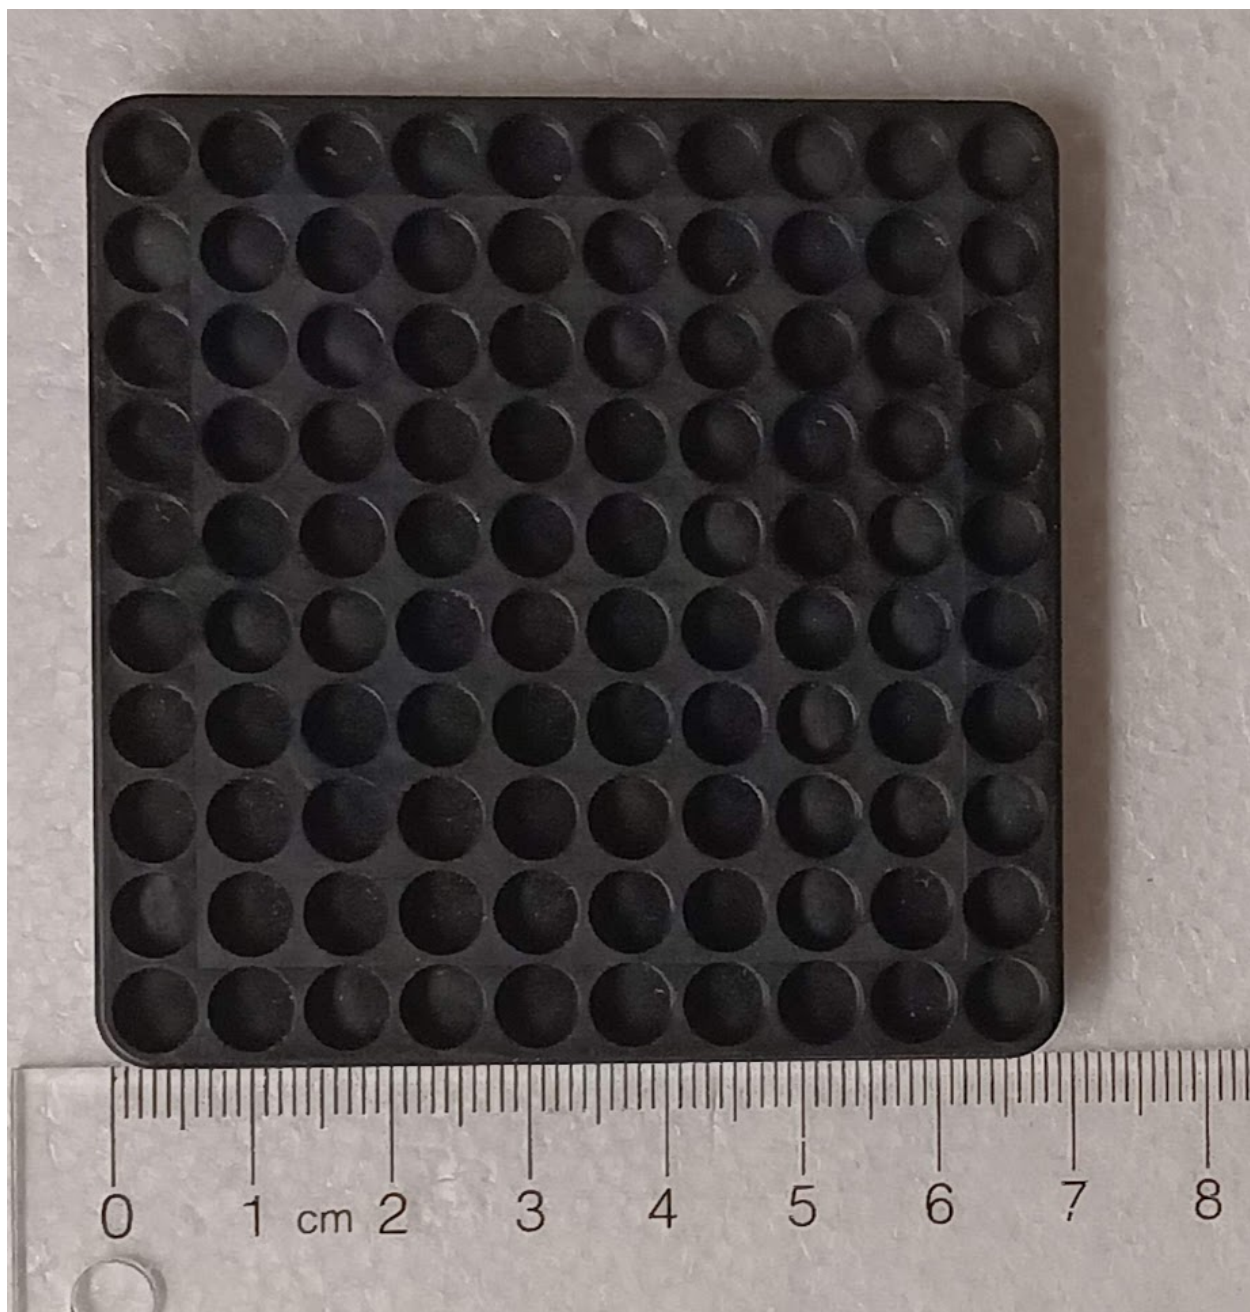

**Figure S1:** Digital image of the mold/tray used to prepare the samples with scale.

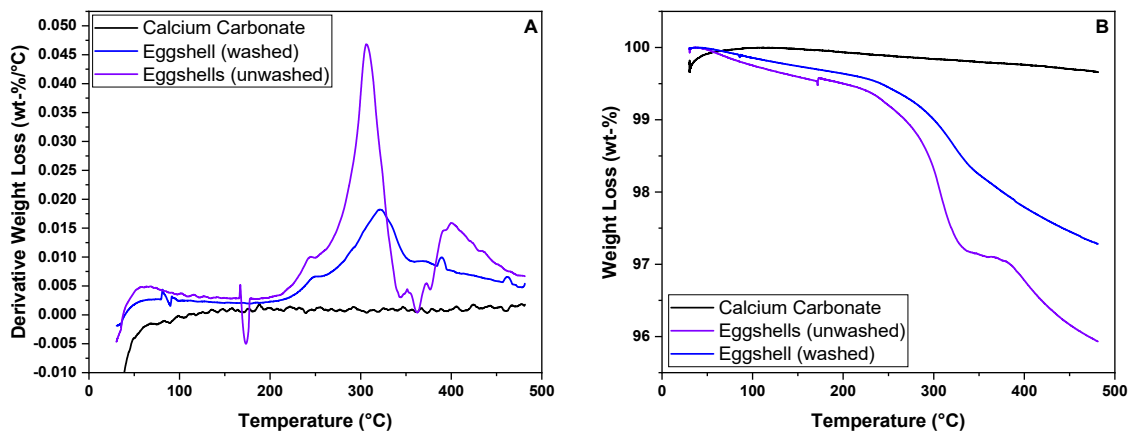

**Figure S2:** DTG profiles (A) of pristine calcium carbonate as comparison to eggshells (washed) and their respective weight loss profiles (B). Note. 2.7 wt-% of organic matter was estimated on the ES sample after washing, which compares to ca. 4.1 wt-% before washing.

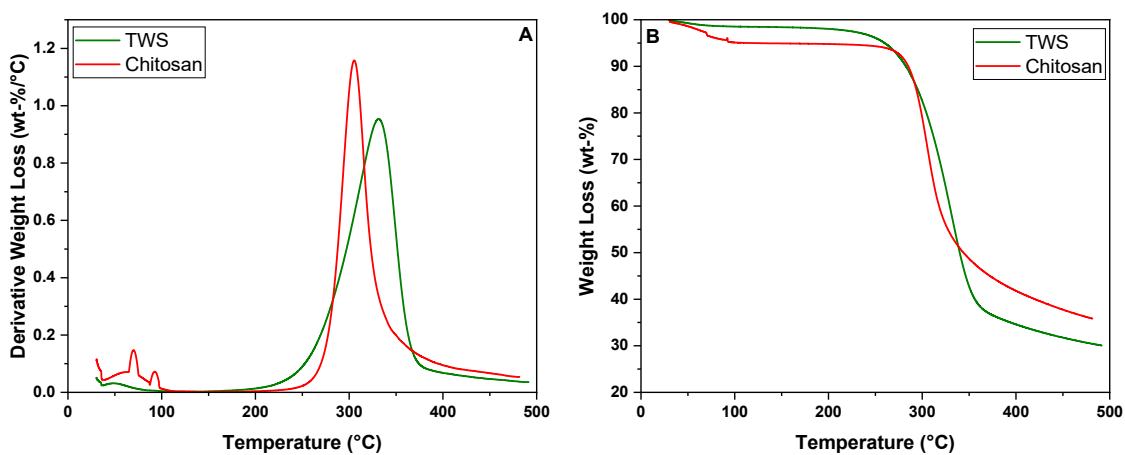

**Figure S3:** DTG profiles (A) of torrefied wheat straw (TWS) and chitosan and their TG profiles (B) respectively.

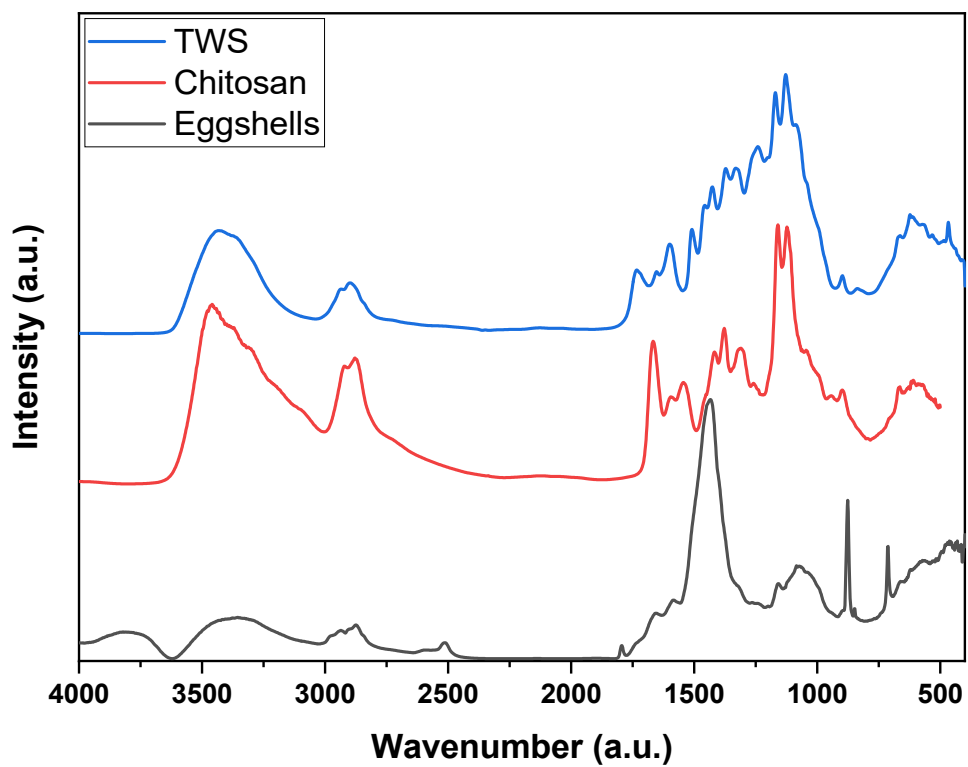

**Figure S4:** FT-IR spectra of the raw materials used to prepare the pelletized adsorbents.

**Orthophosphate Adsorption Isotherms of composites at pH 4.5**

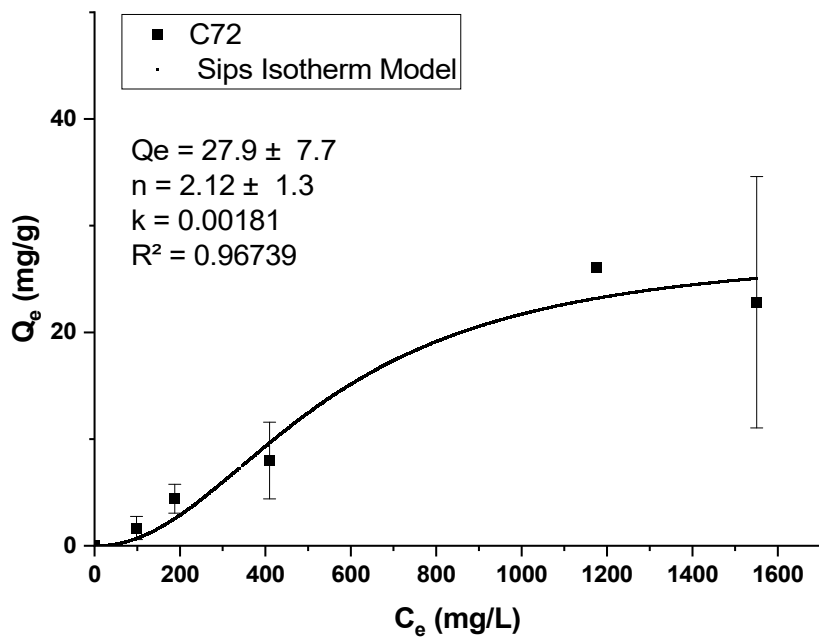

**Figure S5:** Orthophosphate adsorption isotherm study of C72 at pH 4.5.

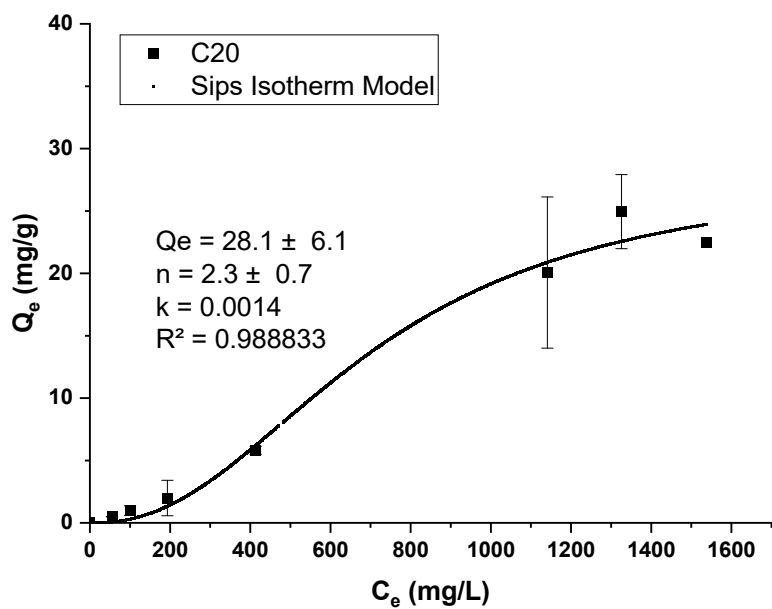

**Figure S6:** Orthophosphate adsorption isotherm study of C20 at pH 4.5.



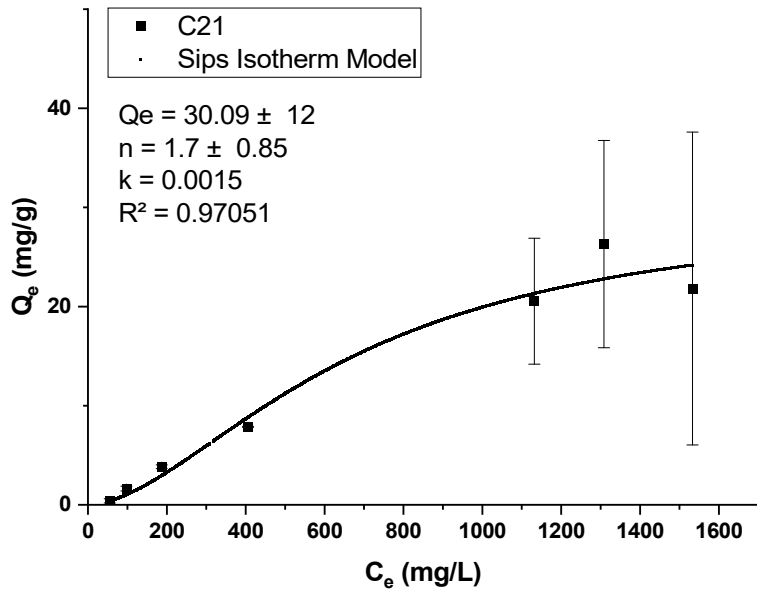

**Figure S7:** Orthophosphate adsorption isotherm study of C21 at pH 4.5.

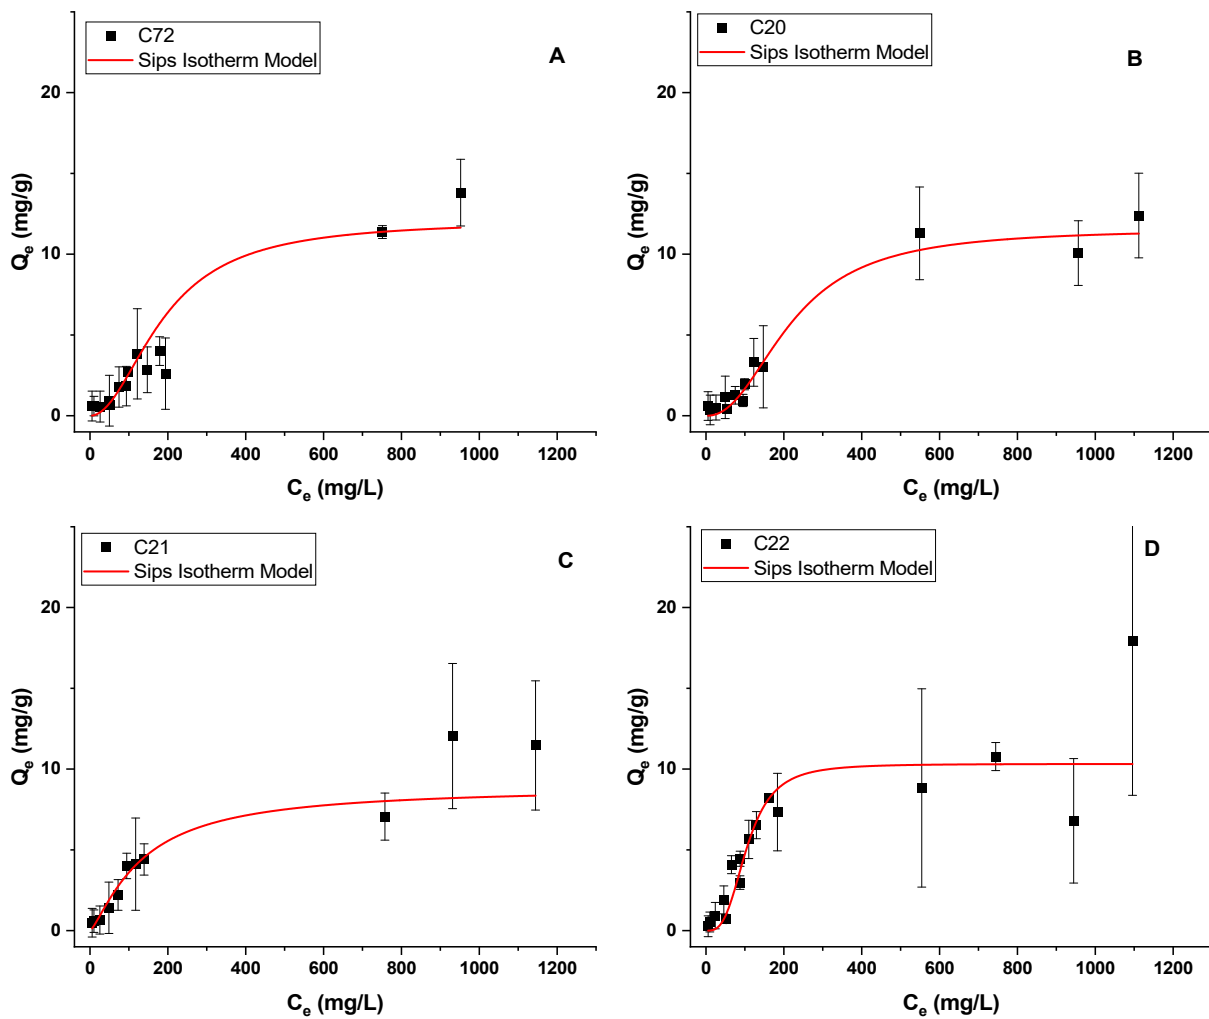

**Figure S8:** Orthophosphate isotherms (*Sips Isotherm Model*) at pH 8.5 on C72 (A), C20 (B), C21 (C) and C22 (D).
